# Supplementary material for: Investment funds are responsible for substantial environmental and social impacts with trade-offs
Source: Research Square preprint supplement (doi:10.21203/rs.3.rs-3345219/v1), 2023-10-17
Supplement: Supplementary file 1 [file 01ff38b6a9eb5788b4321098.xlsx]

## Sheet: USE_final_E_ind
ENVIRONMENTAL	EF impact category	Impact category indicator (unit)	Source	Connected SFDR PAI	Mandatory / Additional	Exact match (Y/N)	Included environmental flows	Key industries driving negative impacts	Impacts	Link
	Acidification	Accumulated Exceedance (mol H+ eq)	Beylot (2019, 2020)	air pollutants	A	N	SOx, NOx, NH3	burning fossil fuels (cobustion is electricity, heating production and transport) -> emissions of SOx and NOx -> acid rain	decline in forests, increase in fish mortality	https://pre-sustainability.com/articles/obscure-impacts-demystified-acidification/
	Climate change, total	GHG emissions, GWP100 (kgCO2 eq)	EXIOBASE, adjusted as per Popescu et al. (2022)	GHG emissions	M	Y	CO2, CH4, N2O, SF6, HFC, PFC	burning of fossil fuels; cement production, etc.	global warming, extreme weather..
	Ecotoxicity, freshwater	Comparative Toxic Unit for ecosystems (CTUe)	Beylot (2019, 2020)	emissions to water; inorganic pollutants	M/A	N	Benzo(a)pyrene, Indeno(1,2,3-cd)pyrene, PCDD_F, HCB, As, Cd, Cr, Hg, Cu, Ni, Pb, Benzo(k)fluoranthene, Se, Zn, B(a)P, Indeno, PCDD/F, NMVOC, PAH, B(k)F	Chemicals, Manufactring, Electricity Production (lead acid batteries; mining and ore processing; tanneries; dye industry; industrial dumpsites)	DALYs	Naidu et al, 2021
	Eutrophication, marine	Fraction of nutrients reaching marine end compartment (kg N eq)	Beylot (2019, 2020)	emissions to water; air pollutants	M/A	N	NH3, N	N from agriculture (by fertilizers released) and combustion processes	changes in soil
	Eutrophication, freshwater	Fraction of nutrients reaching freshwater end compartment (P)	Beylot (2019, 2020)	emissions to water; air pollutants	M/A	N	NH3, P	N from agriculture (by fertilizers released) and combustion processes; P from sewage treatment plants for effluents and leaching from agriculture	algae growth --> not enough oxygen for fish to survive
	Eutrophication, terrestrial	Accumulated Exceedance (mol N eq)	Beylot (2019, 2020)	air pollutants	A	N	NH3, NOx	N from agriculture (by fertilizers released) and combustion processes; P from sewage treatment plants for effluents and leaching from agriculture	algae growth --> not enough oxygen for fish to survive
	Human toxicity, cancer	Comparative Toxic Unit for humans (CTUh)	Beylot (2019, 2020)	emissions of inorganic pollutants	A	N	Benzo(a)pyrene, PCDD_F, HCB, As, Cd, Hg, Ni, B(a)P, Pb, PCDD/F	Chemicals, Manufactring, Electricity Production (lead acid batteries; mining and ore processing; tanneries; dye industry; industrial dumpsites)	DALYs	Naidu et al, 2021
	Human toxicity, non-cancer	Comparative Toxic Unit for humans (CTUh)	Beylot (2019, 2020)	emissions of inorganic pollutants	A	N	HCB, As, Cd, Cu, Hg, Ni, Pb, Zn	Chemicals, Manufactring, Electricity Production (lead acid batteries; mining and ore processing; tanneries; dye industry; industrial dumpsites)	DALYs	Naidu et al, 2021
	Land-use related biodiversity loss	(global m3 PDF years)	Cabernard (2019)	activities negatively affecting biodiversity-sensitive areas; natural species and protected areas; deforestation; land degradation, desertification, soil sealing	M/A	N	Land use, crop, forest, pasture		loss of species, loss of land itself (errosion)
	Particulate matter	Impact on human health (DALYs)	Cabernard (2019)	emissions of inorganic pollutants	A	N	PM2.5, CO, SOx, NH3, TSP	contruction; agriculture; transportation; wood burning	premature death; asthma	https://deq.utah.gov/air-quality/particulate-matter-overview#:~:text=Primary%20particulate%20matter%20is%20emitted,agricultural%20activities%2C%20and%20dusty%20roads.
	Photochemical ozone formation, human health	Tropospheric ozone concentration increase (kg NMVOC eq)	Beylot (2019, 2020)	air pollutants	A	Y	CH4, SOx, CO, NMVOC	Manufacturing - refrigerants, cleaning solvents, and fire extinguishing	crop damage; increase in respiratory diseases
	Material footprint	Material footprint (tonnes of cultivated biomass, extracted mineral ore and fossils)	Cabernard (2019)	n/a	n/a	N	Extraction Used
	Water stress	Water stress (m3 of H2O equivalents)	Cabernard (2019)	water usage and recycling; Exposure to areas of high water stress		N	Water consumption		withdrawal of water
	With EU Taxonomy Envrionmental Objective link
	EU Taxonomy Objective	Connected SFDR PAI	M/A	Porposed EF impact category	Impact category indicator (unit)	Source	Exact match (Y/N)	Included environmental flows
	climate change mitigation	GHG emissions	M	Climate change, total	GHG emissions, GWP100 (kgCO2 eq)	EXIOBASE, adjusted as per Popescu et al. (2022)	Y	CO2, CH4, N2O, SF6, HFC, PFC
	climate change adaptation	N/A	N/A	N/A	N/A	N/A	N/A	N/A
	the sustainable use and protection of water and marine resources	emissions to water; inorganic pollutants	M/A	Ecotoxicity, freshwater	Comparative Toxic Unit for ecosystems (CTUe)	Beylot (2019, 2020)	N	Benzo(a)pyrene, Indeno(1,2,3-cd)pyrene, PCDD_F, HCB, As, Cd, Cr, Hg, Cu, Ni, Pb, Benzo(k)fluoranthene, Se, Zn, B(a)P, Indeno, PCDD/F, NMVOC, PAH, B(k)F
		water usage and recycling; exposure to areas of high water stress		Water stress	Water stress (m3 of H2O equivalents)	Cabernard (2019)	N	Water consumption
		air pollutants	A	Eutrophication, freshwater	Fraction of nutrients reaching freshwater end compartment (P)	Beylot (2019, 2020)	N	NH3, P
		emissions to water; air pollutants	M/A	Eutrophication, marine	Fraction of nutrients reaching marine end compartment (kg N eq)	Beylot (2019, 2020)	N	NH3, N
	the transition to a circular economy	n/a	n/a	Material footprint	Material footprint (tonnes of cultivated biomass, extracted mineral ore and fossils)	Cabernard (2019)	N	Extraction Used
	pollution prevention and control	air pollutants	A	Acidification	Accumulated Exceedance (mol H+ eq)	Beylot (2019, 2020)	N	SOx, NOx, NH3
		air pollutants	A	Eutrophication, terrestrial	Accumulated Exceedance (mol N eq)	Beylot (2019, 2020)	N	NH3, NOx
		emissions of inorganic pollutants	A	Human toxicity, cancer	Comparative Toxic Unit for humans (CTUh)	Beylot (2019, 2020)	N	Benzo(a)pyrene, PCDD_F, HCB, As, Cd, Hg, Ni, B(a)P, Pb, PCDD/F
		emissions of inorganic pollutants	A	Human toxicity, non-cancer	Comparative Toxic Unit for humans (CTUh)	Beylot (2019, 2020)	N	HCB, As, Cd, Cu, Hg, Ni, Pb, Zn
		emissions of inorganic pollutants	A	Particulate matter	Impact on human health (DALYs)	Cabernard (2019)	N	PM2.5, CO, SOx, NH3, TSP
		air pollutants	A	Photochemical ozone formation, human health	Tropospheric ozone concentration increase (kg NMVOC eq)	Beylot (2019, 2020)	Y	CH4, SOx, CO, NMVOC
	the protection and restoration of biodiversity and ecosystems	activities negatively affecting biodiversity-sensitive areas; natural species and protected areas; deforestation; land degradation, desertification, soil sealing	M/A	Land-use related biodiversity loss	(global m3 PDF years)	Cabernard (2019)	N	Land use, crop, forest, pasture

## Sheet: USE_final_S_ind
SOCIAL	Social Indicator (PSILCA database)	Unit	Connected PAI	Mandatory / Additional	Exact match (Y/N)
	Children in employment	% (worker hours)	Operations and suppliers at significant risk of incidents of child labour	A/M	Y
	Gender wage gap	% (worker hours)	Unadjusted gender pay gap	M	Y
	Frequency of forced labour	Cases per 1,000 inhabitants in the country (worker hours)	Operations and suppliers at significant risk of incidents of forced or compulsory labour	A/M	Y
	Presence of sufficient safety measures	Cases per 100,000 employees (worker hours)	example: Lack of processes and measures for preventing trafficking in human beings	A/M	N
	Rate of fatal accidents at workplace	#/yr and 100,000 employees (worker hours)	Rate of accidents	A/M	Y
	Rate of non-fatal accidents at workplace	#/yr and 100,000 employees (worker hours)	Number of days lost to injuries, accidents, fatalities or illness	A/M	Y
	Evidence of violations of laws and employment regulations	Cases per 10000 employees (worker hours)	Violations of UN Global Compact principles and Organisation for Economic Development (OECD) Guidelines for Multinational Enterprises (Respect for core labour standards - e.g., freedom of association and collective bargaining; non-discrimination in employment and occupation)	A/M	Y
	Right of Association	score of ordinal 0-3 scale (worker hours)		A/M	Y
	Right of Collective bargaining	score of ordinal 0-3 scale (worker hours)		A/M	Y
	Right to Strike	score of ordinal 0-3 scale (worker hours)		A/M	Y
	Presence of anti-competitive behaviour or violation of anti-trusted monopoly legislation	score of ordinal 0-3 scale (worker hours)	Cases of insufficient action taken to address breaches of standards of anti-corruption and antibribery	A	Y
	Active involvement of enterprises in corruption	% (worker hours)	Cases of insufficient action taken to address breaches of standards of anti-corruption and antibribery	A	N
	Illiteracy rate, total	% of total population, age 15-24 (worker hours)	Human Rights	A/M	N
	With Minimum Social Safeguards linked
	EU Taxonomy minimum social safeguards	Social Indicator (PSILCA database)	Unit	Connected SFDR PAI	M / A	Exact match (Y/N)
	corruption	Active involvement of enterprises in corruption	% (worker hours)	Cases of insufficient action taken to address breaches of standards of anti-corruption and antibribery	A	N
	fair competition	Presence of anti-competitive behaviour or violation of anti-trusted monopoly legislation	score of ordinal 0-3 scale (worker hours)	Cases of insufficient action taken to address breaches of standards of anti-corruption and antibribery	A	Y
	human rights	Children in employment	% (worker hours)	Operations and suppliers at significant risk of incidents of child labour	A/M	Y
		Gender wage gap	% (worker hours)	Unadjusted gender pay gap	M	Y
		Frequency of forced labour	Cases per 1,000 inhabitants in the country (worker hours)	Operations and suppliers at significant risk of incidents of forced or compulsory labour	A/M	Y
		Presence of sufficient safety measures	Cases per 100,000 employees (worker hours)	Lack of processes and measures for preventing trafficking in human beings; ...	A/M	N
		Rate of fatal accidents at workplace	#/yr and 100,000 employees (worker hours)	Rate of accidents	A/M	Y
		Rate of non-fatal accidents at workplace	#/yr and 100,000 employees (worker hours)	Number of days lost to injuries, accidents, fatalities or illness	A/M	Y
		Evidence of violations of laws and employment regulations	Cases per 10000 employees (worker hours)	Violations of UN Global Compact principles and Organisation for Economic Development (OECD) Guidelines for Multinational Enterprises (Respect for core labour standards - e.g., freedom of association and collective bargaining; non-discrimination in employment and occupation)	A/M	Y
		Right of Association	score of ordinal 0-3 scale (worker hours)		A/M	Y
		Right of Collective bargaining	score of ordinal 0-3 scale (worker hours)		A/M	Y
		Right to Strike	score of ordinal 0-3 scale (worker hours)		A/M	Y
		Trafficking in persons	Tier	Human Rights	A/M	N
	taxation	n/a	n/a	n/a	n/a	n/a

## Sheet: SFDR_PAIs_annex_I
	Adverse sustainability indicator	Metric	Explanation (from beginning of Annex I)	Other details	Indicator Type	Matched IOLCA indicator	Level of match (good/very good)	Selection	Reasoning
Table I		https://ec.europa.eu/finance/docs/level-2-measures/C_2022_1931_1_EN_annexe_acte_autonome_part1_v6.pdf
Statement on principal adverse impacts of investment decisions on sustainability factors
Indicators applicable to investments in investee companies
CLIMATE AND OTHER ENVIRONMENT-RELATED INDICATORS
Greenhouse gas emissions	1. GHG emissions scope 1, 2, 3	GHG emissions scope 1, 2, 3						Yes
	2. Carbon footprint	Carbon footprint			Impact			No	overlap with GHG emissions scope 1, 2, 3
	3. GHG intensity of investee companies	GHG intensity of investee companies	GHG intensity of investee companies		Impact			No	overlap with GHG emissions scope 1, 2, 3
	4. Exposure to companies active in the fossil fuel sector	Exposure to companies active in the fossil fuel sector	Share of investments in companies active in the fossil fuel sector	DIRECTIVE 2000/60/EC Annex X - 45 priority substances: e.g., Naphthalene, Nickel and its compounds, Benzene...	Inventory			No	does not measure impact
	5. Share of non-renewable energy consumption and production	Share of non-renewable energy consumption and production	Share of non-renewable energy consumption and non-renewable energy production of investee companies from non-renewable energy sources compared to renewable energy sources, expressed as a percentage of total energy sources		Inventory			No	does not measure impact
	6. Energy consumption intensity per high impact climate sector	Energy consumption intensity per high impact climate sector	Energy consumption in GWh per million EUR of revenue of investee companies		Inventory			No	does not measure impact
Biodiversity	7. Activities negatively affecting biodiversity-sensitive areas	Activities negatively affecting biodiversity-sensitive areas	Share of investments in investee companies with sites/operations located in or near to biodiversity-sensitive areas where activities of those investee companies negatively affect those areas		Impact			Yes	together with rest of land-use and biodiversity-related indicators
Water	8. Emissions to water	Emissions to water	Tonnes of emissions to water generated by investee companies per million EUR invested, expressed as a weighted average	means direct emissions of priority substances as defined in Article 2(30) of Directive 2000/60/EC of the European Parliament and of the Council(6)and direct emissions of nitrates, phosphates and pesticides	Impact			Yes
Waste	9. Hazardous waste and radioactive waste ratio	Hazardous waste and radioactive waste ratio	Tonnes of hazardous waste and radioactive waste generated by investee companies per million EUR invested, expressed as a weighted average		Inventory			No	no matching IOLCA indicator
INDICATORS FOR SOCIAL AND EMPLOYEE, RESPECT FOR HUMAN RIGHTS, ANTI-CORRUPTION AND ANTI-BRIBERY MATTERS
Social and employee matters	10. Violations of UN Global Compact principles and Organisation for Economic Development (OECD) Guidelines for Multinational Enterprises	Share of investments in investee companies that have been involved in violations of the UNGC principles or OECD Guidelines for Multinational Enterprises						Yes	matching with specific indicators
OECD Guidelines for Multinational Enterprises								Yes	matching with specific indicators
	Human Rights	Human rights due dilligence
	Employment and Industrial Relations	Contribute to the elimination of all forms of forced or compulsory labour
		Respect the right of workers employed by the multinational enterprise to have trade unions and representative organisations of their own choosing recognised for the purpose of collective bargaining
		...
	Environment
	Combating Bribery, Bribe Solicitation and Extortion
	Consumer Interests	goods and services they provide meet all agreed or legally required standards for consumer health and safety
United Nations Global Compact								Yes	matching with specific indicators
	Human Rights	Principle 1: we support and respect the protection of internationally proclaimed human rights in our area of influence.
		Principle 2: we make sure that we are not complicit in human rights abuses.
	Labor Standards	Principle 3: we uphold the freedom of association and the effective recognition of the right to collective bargaining.
		Principle 4: we support the elimination of all forms of forced and compulsory labor.
		Principle 5: we support the effective abolition of child labor.
		Principle 6: we support the elimination of discrimination in respect of employment and occupation.
	Environment	Principle 7: we keep a precautionary approach to environmental challenges.
		Principle 8: we undertake initiatives to promote greater environmental responsibility.
		Principle 9: we encourage the development and diffusion of environmentally friendly technologies.
	Anti-corruption	Principle 10: we work against all forms of corruption, including extortion and bribery, in our area of influence.
	11. Lack of processes and compliance mechanisms to monitor compliance with UN Global Compact principles and OECD Guidelines for Multinational Enterprises	Lack of processes and compliance mechanisms to monitor compliance with UN Global Compact principles and OECD Guidelines for Multinational Enterprises	Share of investments in investee companies without policies to monitor compliance with the UNGC principles or OECD Guidelines for Multinational Enterprises or grievance /complaints handling mechanisms to address violations of the UNGC principles or OECD Guidelines for Multinational Enterprises					No	overlap with the indicator above
	12. Unadjusted gender pay gap	Unadjusted gender pay gap	Average unadjusted gender pay gap of investee companies					Yes
	13. Board gender diversity	Board gender diversity	Average ratio of female to male board members in investee companies, expressed as a percentage of all board members					No	company specific, no match in PSILCA
	14. Exposure to controversial weapons (anti-personnel mines, cluster munitions, chemical weapons and biological weapons)	Exposure to controversial weapons (anti-personnel mines, cluster munitions, chemical weapons and biological weapons)	Share of investments in investee companies involved in the manufacture or selling of					No	no match in PSILCA
Table II
Additional climate and other environment-related indicators
Emissions	1. Emissions of inorganic pollutants	Emissions of inorganic pollutants	Tonnes of inorganic pollutants equivalent per million EUR invested	emissions within or lower than the emission levels associated with the best available techniques (BAT-AEL) for the Large Volume Inorganic Chemicals- Solids and Others industry	Impact			Yes
	2. Emissions of air pollutants	Emissions of air pollutants	Tonnes of air pollutants equivalent per million EUR invested, expressed as a weighted average	direct emissions of sulphur dioxides (SO2), nitrogen oxides (NOx), non-methane volatile organic compounds (NMVOC), and fine particulate matter (PM2,5), ammonia (NH3), and heavy metals (HM)	Impact			Yes
	3. Emissions of ozone-depleting substances	Emissions of ozone-depleting substances	Tonnes of ozone-depleting substances equivalent per million EUR invested, expressed as a weighted average		Impact			No	no matching IOLCA indicator
	4. Investments in companies without carbon emission reduction initiatives	Investments in companies without carbon emission reduction initiatives	Share of investments in investee companies without carbon emission reduction initiatives aimed at aligning with the Paris Agreement		Inventory			No	does not measure impact
Energy performance	5. Breakdown of energy consumption by type of non-renewable sources of energy	Breakdown of energy consumption by type of non-renewable sources of energy	Share of energy from non-renewable sources used by investee companies broken down by each non-renewable energy source		Inventory			No	does not measure impact
Water, waste and material emissions	6. Water usage and recycling	Water usage and recycling	1. Average amount of water consumed by the investee companies (in cubic meters) per million EUR of revenue of investee companies 2. Weighted average percentage of water recycled and reused by investee companies		Inventory			Yes	together with water stress
	7. Investments in companies without water management policies	Investments in companies without water management policies	Share of investments in investee companies without water management policies		Qualitative			No	qualitative indicator, no match in IOLCA indicators
	8. Exposure to areas of high water stress	Exposure to areas of high water stress	Share of investments in investee companies with sites located in areas of high water stress without a water management policy	means regions where the percentage of total water withdrawn is high (40-80 %) or extremely high (greater than 80 %) in the World Resources Institute’s (WRI) Water Risk Atlas tool ‘Aqueduct’	Qualitative			Yes	together with water usage
	9. Investments in companies producing chemicals	Investments in companies producing chemicals	Share of investments in investee companies the activities of which fall under Division 20.2 of Annex I to Regulation (EC) No 1893/2006	20.2 Manufacture of pesticides and other agrochemical products	Inventory			No	qualitative indicator, no match in IOLCA indicators
	10. Land degradation, desertification, soil sealing	Land degradation, desertification, soil sealing	Share of investments in investee companies the activities of which cause land degradation, desertification or soil sealing		Inventory			Yes	together with rest of land-use and biodiversity-related indicators
	11. Investments in companies without sustainable land/agriculture practices	Investments in companies without sustainable land/agriculture practices	Share of investments in investee companies without sustainable land/agriculture practices or policies		Qualitative			No	qualitative indicator, no match in IOLCA indicators
	12. Investments in companies without sustainable oceans/seas practices	Investments in companies without sustainable oceans/seas practices	Share of investments in investee companies without sustainable oceans/seas practices or policies		Qualitative			No	qualitative indicator, no match in IOLCA indicators
	13. Non-recycled waste ratio	Non-recycled waste ratio	Tonnes of non-recycled waste generated by investee companies per million EUR invested, expressed as a weighted average		Inventory			No	no matching IOLCA indicator
	14. Natural species and protected areas	Natural species and protected areas	1.Share of investments in investee companies whose operations affect threatened species 2.Share of investments in investee companies without a biodiversity protection policy covering operational sites owned, leased, managed in, or adjacent to, a protected area or an area of high biodiversity value outside protected areas		Impact			Yes	together with rest of land-use and biodiversity-related indicators
	15. Deforestation	Deforestation	Share of investments in companies without a policy to address deforestation		Inventory			Yes	together with rest of land-use and biodiversity-related indicators
Table III
Additional indicators for social and employee, respect for human rights, anti-corruption and anti-bribery matters
Social and employee matters	1. Investments in companies without workplace accident prevention policies	Investments in companies without workplace accident prevention policies	Share of investments in investee companies without a workplace accident prevention policy					No
	2. Rate of accidents	Rate of accidents	Rate of accidents in investee companies expressed as a weighted average					Yes
	3. Number of days lost to injuries, accidents, fatalities or illness	Number of days lost to injuries, accidents, fatalities or illness	Number of workdays lost to injuries, accidents, fatalities or illness of investee companies expressed as a weighted average					Yes
	4. Lack of a supplier code of conduct	Lack of a supplier code of conduct	Share of investments in investee companies without any supplier code of conduct (against unsafe working conditions, precarious work, child labour and forced labour)					No	overlap with child labour, forced labour indicators
	5. Lack of grievance/complaints handling mechanism related to employee matters	Lack of grievance/complaints handling mechanism related to employee matters	Share of investments in investee companies without any grievance/complaints handling mechanism related to employee matters					No	no match in PSILCA
	6. Insufficient whistleblower protection	Insufficient whistleblower protection	Share of investments in entities without policies on the protection of whistleblowers					No	no match in PSILCA
	7. Incidents of discrimination	Incidents of discrimination	1. Number of incidents of discrimination reported in investee companies expressed as weighted average 2. Number of incidents of discrimination leading to sanctions in investee companies expressed as a weighted average					No	no match in PSILCA
	8. Excessive CEO pay ratio	Excessive CEO pay ratio	Average ratio within investee companies of the annual total compensation for the highest compensated individual to the median annual total compensation for all employees (excluding the highest-compensated individual)					No	governance-related indicator
Human Rights	9. Lack of a human rights policy	Lack of a human rights policy	Share of investments in entities without a human rights policy					No	qualitative indicator, company-dependent
	10. Lack of due diligence	Lack of due diligence	Share of investments in entities without a due diligence process to identify, prevent, mitigate and address adverse human rights impacts					No	qualitative indicator
	11. Lack of processes and measures for preventing trafficking in human beings	Lack of processes and measures for preventing trafficking in human beings	Share of investments in investee companies					Yes
	12. Operations and suppliers at significant risk of incidents of child labour	Operations and suppliers at significant risk of incidents of child labour	Share of investments in investee companies exposed to operations and suppliers at significant risk of incidents of child labour in terms of geographic areas or type of operation					Yes
	13. Operations and suppliers at significant risk of incidents of forced or compulsory labour	Operations and suppliers at significant risk of incidents of forced or compulsory labour	Share of the investments in investee companies exposed to operations and suppliers at significant risk of incidents of forced or compulsory labour in terms in terms of geographic areas and/or the type of operation					Yes
	14. Number of identified cases of severe human rights issues and incidents	Number of identified cases of severe human rights issues and incidents	Number of cases of severe human rights issues and incidents connected to investee companies on a weighted average basis					Yes	Evidence of violations of laws and employment regulations
	15. Lack of anti-corruption and anti-bribery policies	Lack of anti-corruption and anti-bribery policies	Share of investments in entities without policies on anti-corruption and anti-bribery consistent with the United Nations Convention against Corruption					No	Overvap with indicator 17.
	16. Cases of insufficient action taken to address breaches of standards of anti-corruption and antibribery	Cases of insufficient action taken to address breaches of standards of anti-corruption and antibribery	Share of investments in investee companies with identified insufficiencies in actions taken to address breaches in procedures and standards of anti-corruption and anti-bribery					No	Overvap with indicator 17.
	17. Number of convictions and amount of fines for violation of anti-corruption and anti-bribery laws	Number of convictions and amount of fines for violation of anti-corruption and anti-bribery laws	Numbers of convictions and amount of fines for violations of anti-corruption and anti-bribery laws by investee companies					Yes	clear indication of impact

## Sheet: EF
Annex III. Organisation Environmental Footprint Method
Table B. 3. List of the impact categories to be used to calculate the OEF profile
https://eplca.jrc.ec.europa.eu/SDPDB/showLCIAMethod.xhtml;jsessionid=07CB29050C7F7E4781EC22DF3D3F8EC3?uuid=bac8c45b-e778-479e-838c-7c2f54b45610&stock=default
EF impact category	Impact category indicator (LCA)	Unit	Characterisation model	Robustness
Climate change, total	Global warming potential (GWP100)	kg CO2 eq	Bern model - Global warming potentials (GWP) over a 100-year time horizon (based on IPCC 2013)	I
Ozone depletion	Ozone depletion potential (ODP)	kg CFC-11 eq	EDIP model based on the ODPs of the World Meteorological Organisation (WMO) over an infinite time horizon (WMO 2014 + integrations)	I
Human toxicity, cancer	Comparative toxic unit for humans (CTUh)	CTUh	based on USEtox2.1 model (Fantke et al. 2017), adapted as in Saouter et al., 2018	III
Human toxicity, non-cancer	Comparative toxic unit for humans (CTUh)	CTUh	based on USEtox2.1 model (Fantke et al. 2017), adapted as in Saouter et al., 2018	III
Particulate matter	Impact on human health	Disease incidence	PM model (Fantke et al., 2016 in UNEP 2016)	I
Ionising radiation, human health	Human exposure efficiency relative to U235	kBq U235 eq	Human health effect model as developed by Dreicer et al. 1995 (Frischknecht et al, 2000)	II
Photochemical ozone formation, human health	Tropospheric ozone concentration increase	kg NMVOC eq	LOTOS-EUROS model (Van Zelm et al, 2008) as applied in ReCiPe 2008	II
Acidification	Accumulated exceedance (AE)	mol H+ eq	Accumulated exceedance (Seppälä et al. 2006, Posch et al, 2008)	II
Eutrophication, terrestrial	Accumulated exceedance (AE)	mol N eq	Accumulated exceedance (Seppälä et al. 2006, Posch et al, 2008)	II
Eutrophication, freshwater	Fraction of nutrients reaching freshwater end compartment (P)	kg P eq	EUTREND model (Struijs et al, 2009) as applied in ReCiPe	II
Eutrophication, marine	Fraction of nutrients reaching marine end compartment (N)	kg N eq	EUTREND model (Struijs et al, 2009) as applied in ReCiPe	II
Ecotoxicity, freshwater	Comparative toxic unit for ecosystems (CTUe)	CTUe	based on USEtox2.1 model (Fantke et al. 2017), adapted as in Saouter et al., 2018	III
Land use	Soil quality index	Dimensionless (pt)	Soil quality index based on LANCA model (De Laurentiis et al. 2019) and on the LANCA CF version 2.5 (Horn and Maier, 2018)	III
Water use	User deprivation potential (deprivation-weighted water consumption)	m3 water eq of deprived water	Available WAter REmaining (AWARE) model (Boulay et al., 2018; UNEP 2016)	III
Resource use, minerals and metals	Abiotic resource depletion (ADP ultimate reserves)	kg Sb eq	van Oers et al., 2002 as in CML 2002 method, v.4.8	III
Resource use, fossils	Abiotic resource depletion – fossil fuels (ADP-fossil)18	MJ	van Oers et al., 2002 as in CML 2002 method, v.4.8	III

## Sheet: EU_Taxonomy_EO
Environmental Objective	Explanation for activity (Taxonomy Report)	Sustainability Indicator	Note	Example
climate change mitigation	should contribute substantially to the stabilisation of greenhouse gas emissions by avoiding or reducing them or by enhancing greenhouse gas removals. The economic activity should be consistent with the long-term temperature goal of the Paris Agreement.	GHG emissions (tCO2eq)	Emissions reduction potential	e.g. mining of a metal that is needed for the transition, but that is higly energy intensive
climate change adaptation	should contribute substantially to reducing or preventing the adverse impact of the current or expected future climate, or the risks of such adverse impact, whether on that activity itself or on people, nature or assets. That environmental objective should be interpreted in accordance with relevant Union law and the Sendai Framework for Disaster Risk Reduction 2015–2030.	?		e.g. building of dams; reduce reliance of fossil fuels; infrastructure; resilient materials; energy efficiency
the sustainable use and protection of water and marine resources	Regulation (EU) No 1380/2013 of the European Parliament and of the Council(9) and Directives 2000/60/EC(10), 2006/7/EC(11), 2006/118/EC(12), 2008/56/EC(13) and 2008/105/EC(14) of the European Parliament and of the Council, Council Directives 91/271/EEC(15), 91/676/EEC(16) and 98/83/EC(17) and Commission Decision (EU) 2017/848(18), and with the communications of the Commission of 18 July 2007 on ‘…	Freshwater aquatic ecotoxicity; Marine aquatic ecotoxicity; Eutrophication; photochemical oxidation (MIR; very high NOx)		link to nitrates in water; wastewater treatment; protection of groundwater against pollution and deterioration
the transition to a circular economy	circular economy, waste and chemicals, including Regulations (EC) No 1013/2006(19), (EC) No 1907/2006(20) and (EU) 2019/1021(21) of the European Parliament and of the Council and Directives 94/62/EC(22), 2000/53/EC(23), 2006/66/EC(24), 2008/98/EC(25), 2010/75/EU(26), 2011/65/EU(27), 2012/19/EU(28), (EU) 2019/883(29) and (EU) 2019/904(30) of the European Parliament and of the Council, Council Dire…	Resource Use	examples of contributions: increase the durability, reparability, upgradability and reusability of products; reduce the use of resources through the design and choice of materials, facilitating repurposing, disassembly and deconstruction in the buildings and construction sector, in particular to reduce the use of building materials and promote the reuse of building materials; developing ‘product-…	from directives: shipments of waste; organic pollutants; packaging and packaging waste; end-of life vehicles; batteries and accumulators and waste batteries and accumulators; industrial emissions (integrated pollution prevention and control); restriction of the use of certain hazardous substances in electrical and electronic equipment; waste electrical and electronic equipment (WEEE); reduction o…
pollution prevention and control	objective of pollution prevention and control should be interpreted in accordance with relevant Union law, including Directives 2000/60/EC, 2004/35/EC(35), 2004/107/EC(36), 2006/118/EC, 2008/50/EC(37), 2008/105/EC, 2010/75/EU, (EU) 2016/802(38) and (EU) 2016/2284(39) of the European Parliament and of the Council.	Particulate matter/Respiratory inorganics endpoint; Environmental Damage Indicator; photochemical oxidation (MIR; very high NOx)		environmental liability with regard to the prevention and remedying of environmental damage; arsenic, cadmium, mercury, nickel and polycyclic aromatic hydrocarbons in ambient air; cleaner air; reduction in the sulphur content of certain liquid fuels
the protection and restoration of biodiversity and ecosystems	Regulations (EU) No 995/2010(40), (EU) No 511/2014(41) and (EU) No 1143/2014(42) of the European Parliament and of the Council, Directive 2009/147/EC of the European Parliament and of the Council(43), Council Regulation (EC) No 338/97(44), Council Directives 91/676/EEC and 92/43/EEC(45), and with the communications of the Commission of 21 May 2003 on ‘Forest Law Enforcement, Governance and Trade …	Damage to Ecosystem Quality	protecting, conserving or restoring biodiversity and ecosystems, and thereby enhancing ecosystem services: (1) provisioning services, such as the provisioning of food and water; (2) regulating services, such as the control of climate and disease; (3) supporting services, such as nutrient cycles and oxygen production; (4) and cultural services, such as providing spiritual and recreational benefits.	timber production; prevention and management of the introduction and spread of invasive alien species; protection and conservation of wild flora and fauna

## Sheet: SLCA_SFDR
Category	Sub-category	PSILCA Indicator	Detail (from PSILCA documentation)	Unit	Unit & worker hours	Derived for all risk levels for RBICS industries	indicator_short	SFDR-related indicator	EU Minimum Safguards
Workers	Child labour	Children in employment, total		%	% (worker hours)	yes	childrenempl_t	Child labour	Human rights
Workers	Discrimination	Gender wage gap		%	% (worker hours)	yes	genderwagegap	Unadjusted gender pay gap	Human rights
Workers	Forced labour	Frequency of forced labour		Cases per 1,000 inhabitants in the country	Cases per 1,000 inhabitants in the country (worker hours)	yes	forcedlabfreq	Forced labour	Human rights
Workers	Health and safety	Presence of sufficient safety measures	provided as number of Occupational Safety and Health Administration (OSHA) violations per year and year and 100,000 employees	Cases per 100,000 employees	Cases per 100,000 employees (worker hours)	yes	safetymeasures		Human rights
Workers	Health and safety	Rate of fatal accidents at workplace		#/yr and 100,000 employees	#/yr and 100,000 employees (worker hours)	yes	fatalacc	Rate of accidents	Human rights
Workers	Health and safety	Rate of non-fatal accidents at workplace		#/yr and 100,000 employees	#/yr and 100,000 employees (worker hours)	yes	nonfatalacc	Rate of accidents	Human rights
Workers	Social benefits, legal issues	Evidence of violations of laws and employment regulations		Cases per 10000 employees	Cases per 10000 employees (worker hours)	yes	viollawemploymentreg		Human rights
Workers	Workers' rights	Right of Association	risk that rights of workers are restricted	score of ordinal 0-3 scale	score of ordinal 0-3 scale (worker hours)	yes	rightsofassoc	UNGC principles	Human rights
Workers	Workers' rights	Right of Collective bargaining	risk that rights of workers are restricted	score of ordinal 0-3 scale	score of ordinal 0-3 scale (worker hours)	yes	rightsofcollectbarg	UNGC principles	Human rights
Workers	Workers' rights	Right to Strike	risk that rights of workers are restricted	score of ordinal 0-3 scale	score of ordinal 0-3 scale (worker hours)	yes	rightstrike	UNGC principles	Human rights
Value chain actors	Corruption	Presence of anti-competitive behaviour or violation of anti-trust and monopoly legislation		score of ordinal 0-3 scale	score of ordinal 0-3 scale (worker hours)	yes	anticompbehaviour		Fair competition
Value chain actors	Fair competition	Active involvement of enterprises in corruption and bribery		%	% (worker hours)	yes	invincorruption	Corruption	Corruption
Workers	Forced labour	Trafficking in persons		Tier	Tier (worker hours)	yes	trafficking	Lack of processes and measures for preventing trafficking in human beings	Human rights

## Sheet: PSILCA
indicator	unit	selection	reasoning	SFDR indicator
Active involvement of enterprises in corruption and bribery	%	yes	very good link to SFDR indicator	Cases of insufficient action taken to address breaches of standards of anti-corruption and antibribery
Certified environmental management systems	# of CEMS per 10000 employees	no	environmental
Children in employment, female	% of female children ages 7-14	no	repetition
Children in employment, male	% of male children ages 7-14	no	repetition
Children in employment, total	% of all children ages 7-14	yes	very good link to SFDR indicator	Operations and suppliers at significant risk of incidents of child labour
Contribution of the sector to economic development	% of GDP	no	not social
DALYs due to indoor and outdoor air and water pollution	DALY rate	no	not social
Domestic and external health expenditure (% of current health expenditure)	%	no	not social
Domestic general government health expenditure (% of current health expenditure)	%	no	not social
Drinking water coverage	%	no	not social
Embodied CO2 footprint	t per $	no	environmental
Embodied CO2-eq footprint	t per $	no	environmental
Embodied agricultural area footprint	ha/$1	no	environmental
Embodied forest area footprint	ha/$1	no	not social
Embodied value added total	$/$	no	not social
Embodied water footprint	Mm3/$	no	not social
Emigration rate	ratio	no	not related to company impact
Evidence of violations of laws and employment regulations	Cases per 10000 employees	yes	very good link to SFDR indicator	Evidence of violations of laws and employment regulations
Extraction of biomass (related to area)	annual t/kmÂ²	no	environmental
Extraction of biomass (related to population)	annual t/cap	no	environmental
Extraction of fossil fuels	annual t/cap	no	environmental
Extraction of industrial and construction minerals	annual t/cap	no	environmental
Extraction of ores	annual t/cap	no	environmental
Frequency of forced labour	â€°	yes	very good link to SFDR indicator	Operations and suppliers at significant risk of incidents of forced or compulsory labour
Gender wage gap	%	yes	very good link to SFDR indicator	Unadjusted gender pay gap
Global Peace Index	ratio	no	not related to company impact
Goods produced by forced labour	#	no	already covered by another matching indicator
Health expenditure, external resources	% of total expenditure on health	no	not relevant
Health expenditure, out-of-pocket	% of total expenditure on health	no	not relevant
Health expenditure, public	% of total expenditure on health	no	not relevant
Health expenditure, total	% of GDP	no	not relevant
Illiteracy rate, female	% of female population	no	not connected to SFDR indicators
Illiteracy rate, male	% of male population	no	not connected to SFDR indicators
Illiteracy rate, total	% of total population	no	not connected to SFDR indicators
Immigration rate	ratio	no	not related to company impact
Indigenous People Rights Protection Index	6 point scale	no	not relevant
International Migrant Stock	%	no	not relevant
International migrant workers in the sector	%	no	not connected to SFDR indicators
Level of industrial water use (related to renewable water resources)	% of total actual renewable water resources	no	environmental
Level of industrial water use (related to total withdrawal)	% of total water withdrawal	no	environmental
Life expectancy at birth	Years	no	not related to company impact
Living wage Lower bound	USD	no	not related to company impact
Living wage Upper Bound	USD	no	not related to company impact
Living wage, per month (AV)	USD	no	not related to company impact
Membership in an initiative that promotes social responsibility along the supply chain	# per 100,000 employees	no	not relevant
Men in the sectoral labour force	ratio	no	not relevant
Minimum wage, per month	USD	no	not relevant
Net migration rate	â€°	no	not related to company impact
Number of asylum seekers in relation to total population	ratio	no	not related to company impact
Number of threatened species	# species/$1	no	environmental
Pollution level of the country	Pollution Index	no	environmental
Presence of anti-competitive behaviour or violation of anti-trust and monopoly legislation	Cases per 10000 employees	yes	very good link to SFDR indicator
Presence of indigenous population	Y/N	no	not related to company impact
Presence of sufficient safety measures	Cases per 100,000 employees	yes	Lack of processes and measures for preventing trafficking in human beings
Public expenditure on education	% of GDP	no	not related to company impact
Public sector corruption	Index score	no	not related to company impact
Rate of fatal accidents at workplace	#/yr and 100,000 employees	yes	very good link to SFDR indicator, need to merge both accidents indicators	Rate of accidents
Rate of non-fatal accidents at workplace	#/yr and 100,000 employees	yes	very good link to SFDR indicator, need to merge both accidents indicators	Rate of accidents
Right of Association	4 point scale	yes	good link to SFDR indicator	Violations of UN Global Compact principles and Organisation for Economic Development (OECD) Guidelines for Multinational Enterprises (Respect for core labour standards - e.g., freedom of association and collective bargaining; non-discrimination in employment and occupation)
Right of Collective bargaining	4 point scale	yes	good link to SFDR indicator	Violations of UN Global Compact principles and Organisation for Economic Development (OECD) Guidelines for Multinational Enterprises (Respect for core labour standards - e.g., freedom of association and collective bargaining; non-discrimination in employment and occupation)
Right to Strike	4 point scale	yes	good link to SFDR indicator	Violations of UN Global Compact principles and Organisation for Economic Development (OECD) Guidelines for Multinational Enterprises (Respect for core labour standards - e.g., freedom of association and collective bargaining; non-discrimination in employment and occupation)
Sanitation coverage	%	no	not connected to SFDR indicators
Sector average wage, per month	USD	no	not relevant
Social security expenditures	% of GDP	no	not connected to SFDR indicators
Trade union density	%	no	covered partially by labor rights indicators
Trafficking in persons	Tier	yes	very good link to SFDR indicator	Lack of processes and measures for preventing trafficking in human beings
Unemployment rate in the country	%	no	not related to company impact
Violations of mandatory health and safety standards	ratio	yes	weak fit with SFDR indicator	Investments in companies without workplace accident prevention policies
Weekly hours of work per employee	h	no	not relevant
Women in the sectoral labour force	ratio	no	covered partially by gender pay gap
Workers affected by natural disasters	%	no	environmental
Youth illiteracy rate, female	% of female population, age 15-24	no	not relevant
Youth illiteracy rate, male	% of male population, age 15-24	no	not relevant
Youth illiteracy rate, total	% of total population, age 15-24	no	not relevant
