# Supplementary material for: Investment funds are responsible for substantial environmental and social impacts with trade-offs
Source: Research Square preprint supplement (doi:10.21203/rs.3.rs-3345219/v1), 2023-10-17
Supplement: Supplementary file 2 [file 4c2a829902875137c1587f54.xlsx]

## Sheet: acidif
company_proper_name	unit	indicator_short	sic_desc	industry_new	holdings_adjusted_mv	scope_direct_owned	scope_indirect_owned	scope_lc_owned
Iberdrola SA	mol H+ eq	acidif	Electric Services	Utilities	1010198473	1.38269e+09	5.86485e+07	1.44134e+09
Enel SpA	mol H+ eq	acidif	Electric Services	Utilities	792558441	1.06991e+09	1.15604e+08	1.18552e+09
China Mengniu Dairy Co., Ltd.	mol H+ eq	acidif	Dairy Farms	FMCG	927789363	1.56908e+06	7.97425e+08	7.98994e+08
Nestle S.A.	mol H+ eq	acidif	Food Preparations, Not Elsewhere Classified	FMCG	1651976028	1.13812e+07	4.4555e+08	4.56931e+08
Danone SA	mol H+ eq	acidif	Food Preparations, Not Elsewhere Classified	FMCG	482306338	5.07754e+06	4.4871e+08	4.53788e+08
Unilever PLC	mol H+ eq	acidif	Perfumes, Cosmetics, and Other Toilet Preparations	FMCG	1429065252	2.78769e+07	3.90641e+08	4.18518e+08
China Petroleum & Chemical Corporation Class H	mol H+ eq	acidif	Crude Petroleum and Natural Gas	Oil & Gas Extraction	134325218	7.50026e+07	3.28761e+08	4.03764e+08
Samsung Electronics Co Ltd Pfd Non-Voting	mol H+ eq	acidif	Radio and Television Broadcasting and Communications Equipment	IT	886343368	1.01462e+07	3.47443e+08	3.57589e+08
Schneider Electric SE	mol H+ eq	acidif	Current-Carrying Wiring Devices	Industrials	2648239123	6.62501e+06	3.48132e+08	3.54757e+08
PetroChina Company Limited Class H	mol H+ eq	acidif	Crude Petroleum and Natural Gas	Oil & Gas Extraction	67807951	7.44342e+07	2.31259e+08	3.05693e+08
Roche Holding Ltd Dividend Right Cert.	mol H+ eq	acidif	Pharmaceutical Preparations	Pharma	2954048751	5.09227e+07	2.51928e+08	3.02851e+08
Samsung Electronics Co., Ltd.	mol H+ eq	acidif	Radio and Television Broadcasting and Communications Equipment	IT	2578987006	7.39868e+06	2.53357e+08	2.60756e+08
EDP-Energias de Portugal SA	mol H+ eq	acidif	Electric Services	Utilities	210918965	2.26345e+08	9.54691e+06	2.35892e+08
Sanofi	mol H+ eq	acidif	Pharmaceutical Preparations	Pharma	1494781361	3.66002e+07	1.77179e+08	2.13779e+08
Siemens AG	mol H+ eq	acidif	Manufacturing Industries, Not Elsewhere Classified	Industrials	1240644335	7.74509e+06	1.45974e+08	1.53719e+08
Bunge Limited	mol H+ eq	acidif	Vegetable Oil Mills, Except Corn, Cottonseed, and Soybean	FMCG	175271832	4.25635e+06	1.4095e+08	1.45207e+08
Koninklijke DSM N.V.	mol H+ eq	acidif	Industrial Organic Chemicals, Not Elsewhere Classified	Chemicals	806229203	2.66114e+07	1.17854e+08	1.44465e+08
Intel Corporation	mol H+ eq	acidif	Semiconductors and Related Devices	IT	890131561	1.69415e+06	1.42333e+08	1.44027e+08
adidas AG	mol H+ eq	acidif	Rubber and Plastics Footwear	Consumer Discretionary	795871507	5.23348e+06	1.35344e+08	1.40577e+08
Infineon Technologies AG	mol H+ eq	acidif	Semiconductors and Related Devices	IT	2143444788	1.41597e+06	1.3745e+08	1.38866e+08
Johnson Matthey Plc	mol H+ eq	acidif	Chemicals and Chemical Preparations, Not Elsewhere Classified	Chemicals	259021394	2.5263e+07	1.09166e+08	1.34429e+08
Shell PLC	mol H+ eq	acidif	Crude Petroleum and Natural Gas	Oil & Gas Extraction	343991918	4.86725e+07	7.59687e+07	1.24641e+08
NXP Semiconductors NV	mol H+ eq	acidif	Semiconductors and Related Devices	IT	1878889935	1.18986e+06	1.06476e+08	1.07666e+08
CRH Plc	mol H+ eq	acidif	Cement, Hydraulic	Industrials	410347147	6.73784e+07	3.77296e+07	1.05108e+08
TotalEnergies SE	mol H+ eq	acidif	Crude Petroleum and Natural Gas	Oil & Gas Extraction	500650784	2.75063e+07	7.138e+07	9.88863e+07
Procter & Gamble Company	mol H+ eq	acidif	Soap and Other Detergents, Except Specialty Cleaners	FMCG	1332956790	1.54337e+07	7.86557e+07	9.40894e+07
Bayerische Motoren Werke AG	mol H+ eq	acidif	Motor Vehicles and Passenger Car Bodies	Automotive	346073204	2.62806e+06	9.11067e+07	9.37348e+07
Allianz SE	mol H+ eq	acidif	Insurance Carriers, Not Elsewhere Classified	Financials	1155488903	5.77057e+06	8.695e+07	9.27206e+07
Reckitt Benckiser Group plc	mol H+ eq	acidif	Soap and Other Detergents, Except Specialty Cleaners	FMCG	811057424	1.25963e+07	7.69452e+07	8.95415e+07
Akzo Nobel N.V.	mol H+ eq	acidif	Paints, Varnishes, Lacquers, Enamels, and Allied Products	Chemicals	356941102	1.47463e+07	7.29807e+07	8.77269e+07

## Sheet: climate_change
company_proper_name	unit	indicator_short	sic_desc	industry_new	holdings_adjusted_mv	scope_direct_owned	scope_indirect_owned	scope_lc_owned
Enel SpA	kg CO2 eq	climate_change	Electric Services	Utilities	792558441	2.01223e+11	3.37433e+10	2.34966e+11
China Petroleum & Chemical Corporation Class H	kg CO2 eq	climate_change	Crude Petroleum and Natural Gas	Oil & Gas Extraction	134325218	1.60401e+11	5.2951e+10	2.13352e+11
Iberdrola SA	kg CO2 eq	climate_change	Electric Services	Utilities	1010198473	1.39094e+11	2.60365e+10	1.65131e+11
PetroChina Company Limited Class H	kg CO2 eq	climate_change	Crude Petroleum and Natural Gas	Oil & Gas Extraction	67807951	4.50353e+10	3.55146e+10	8.05499e+10
China Mengniu Dairy Co., Ltd.	kg CO2 eq	climate_change	Dairy Farms	FMCG	927789363	4.66771e+08	5.08161e+10	5.12829e+10
Republic Services, Inc.	kg CO2 eq	climate_change	Refuse Systems	Industrials	965286804	3.90723e+10	1.452e+09	4.05243e+10
Shell PLC	kg CO2 eq	climate_change	Crude Petroleum and Natural Gas	Oil & Gas Extraction	343991918	1.27453e+10	2.6676e+10	3.94213e+10
Samsung Electronics Co Ltd Pfd Non-Voting	kg CO2 eq	climate_change	Radio and Television Broadcasting and Communications Equipment	IT	886343368	1.93037e+09	3.36036e+10	3.5534e+10
Schneider Electric SE	kg CO2 eq	climate_change	Current-Carrying Wiring Devices	Industrials	2648239123	1.13324e+09	3.21605e+10	3.32937e+10
Repsol SA	kg CO2 eq	climate_change	Crude Petroleum and Natural Gas	Oil & Gas Extraction	147075650	1.41406e+10	1.86183e+10	3.27589e+10
NextEra Energy, Inc.	kg CO2 eq	climate_change	Electric Services	Utilities	1804118352	3.06696e+10	1.31842e+09	3.1988e+10
Roche Holding Ltd Dividend Right Cert.	kg CO2 eq	climate_change	Pharmaceutical Preparations	Pharma	2954048751	6.50812e+09	2.42434e+10	3.07515e+10
TotalEnergies SE	kg CO2 eq	climate_change	Crude Petroleum and Natural Gas	Oil & Gas Extraction	500650784	1.06005e+10	1.94735e+10	3.0074e+10
Unilever PLC	kg CO2 eq	climate_change	Perfumes, Cosmetics, and Other Toilet Preparations	FMCG	1429065252	3.46392e+09	2.44472e+10	2.79111e+10
Waste Management, Inc.	kg CO2 eq	climate_change	Refuse Systems	Utilities	694668004	2.4934e+10	1.28792e+09	2.6222e+10
Nestle S.A.	kg CO2 eq	climate_change	Food Preparations, Not Elsewhere Classified	FMCG	1651976028	2.06318e+09	2.3989e+10	2.60522e+10
Samsung Electronics Co., Ltd.	kg CO2 eq	climate_change	Radio and Television Broadcasting and Communications Equipment	IT	2578987006	1.40764e+09	2.4504e+10	2.59116e+10
EDP-Energias de Portugal SA	kg CO2 eq	climate_change	Electric Services	Utilities	210918965	2.11403e+10	4.6737e+09	2.5814e+10
Danone SA	kg CO2 eq	climate_change	Food Preparations, Not Elsewhere Classified	FMCG	482306338	1.12503e+09	2.44768e+10	2.56018e+10
UPM-Kymmene Oyj	kg CO2 eq	climate_change	Pulp Mills	Industrials	483038755	1.64242e+10	4.2331e+09	2.06573e+10
Sanofi	kg CO2 eq	climate_change	Pharmaceutical Preparations	Pharma	1494781361	4.64355e+09	1.59877e+10	2.06312e+10
KunLun Energy Co. Ltd.	kg CO2 eq	climate_change	Natural Gas Distribution	Utilities	55988674	1.72634e+10	3.08733e+09	2.03507e+10
Siemens AG	kg CO2 eq	climate_change	Manufacturing Industries, Not Elsewhere Classified	Industrials	1240644335	1.49196e+09	1.64884e+10	1.79803e+10
Linde plc	kg CO2 eq	climate_change	Industrial Gases	Industrials	818900469	1.16631e+10	5.78235e+09	1.74455e+10
CRH Plc	kg CO2 eq	climate_change	Cement, Hydraulic	Industrials	410347147	9.56675e+09	5.70466e+09	1.52714e+10

## Sheet: ecotox_freshwat
company_proper_name	unit	indicator_short	sic_desc	industry_new	holdings_adjusted_mv	scope_direct_owned	scope_indirect_owned	scope_lc_owned
China Mengniu Dairy Co., Ltd.	CTUe	ecotox_freshwater	Dairy Farms	FMCG	927789363	3.51245e+07	3.31711e+10	3.32062e+10
Schneider Electric SE	CTUe	ecotox_freshwater	Current-Carrying Wiring Devices	Industrials	2648239123	1.42732e+08	2.13462e+10	2.14889e+10
Danone SA	CTUe	ecotox_freshwater	Food Preparations, Not Elsewhere Classified	FMCG	482306338	6.47632e+07	1.93182e+10	1.9383e+10
Nestle S.A.	CTUe	ecotox_freshwater	Food Preparations, Not Elsewhere Classified	FMCG	1651976028	9.90977e+07	1.86791e+10	1.87782e+10
Samsung Electronics Co Ltd Pfd Non-Voting	CTUe	ecotox_freshwater	Radio and Television Broadcasting and Communications Equipment	IT	886343368	1.35815e+08	1.86019e+10	1.87377e+10
Unilever PLC	CTUe	ecotox_freshwater	Perfumes, Cosmetics, and Other Toilet Preparations	FMCG	1429065252	2.4883e+08	1.59067e+10	1.61556e+10
Samsung Electronics Co., Ltd.	CTUe	ecotox_freshwater	Radio and Television Broadcasting and Communications Equipment	IT	2578987006	9.90373e+07	1.35646e+10	1.36637e+10
China Petroleum & Chemical Corporation Class H	CTUe	ecotox_freshwater	Crude Petroleum and Natural Gas	Oil & Gas Extraction	134325218	3.75056e+08	1.15785e+10	1.19536e+10
Siemens AG	CTUe	ecotox_freshwater	Manufacturing Industries, Not Elsewhere Classified	Industrials	1240644335	1.38029e+08	1.04087e+10	1.05467e+10
Roche Holding Ltd Dividend Right Cert.	CTUe	ecotox_freshwater	Pharmaceutical Preparations	Pharma	2954048751	6.70089e+08	9.38867e+09	1.00588e+10
ArcelorMittal SA	CTUe	ecotox_freshwater	Steel Works, Blast Furnaces (Incl. Coke Ovens), and Rolling Mills	Manufacturing metals	40753366	5.97821e+09	1.54983e+09	7.52804e+09
Intel Corporation	CTUe	ecotox_freshwater	Semiconductors and Related Devices	IT	890131561	3.73768e+07	7.1971e+09	7.23447e+09
Sanofi	CTUe	ecotox_freshwater	Pharmaceutical Preparations	Pharma	1494781361	3.90847e+08	6.61336e+09	7.0042e+09
Infineon Technologies AG	CTUe	ecotox_freshwater	Semiconductors and Related Devices	IT	2143444788	2.39496e+07	6.51091e+09	6.53486e+09
Enel SpA	CTUe	ecotox_freshwater	Electric Services	Utilities	792558441	2.23243e+09	4.20523e+09	6.43766e+09
Bayerische Motoren Werke AG	CTUe	ecotox_freshwater	Motor Vehicles and Passenger Car Bodies	Automotive	346073204	1.46822e+08	5.91566e+09	6.06248e+09
NXP Semiconductors NV	CTUe	ecotox_freshwater	Semiconductors and Related Devices	IT	1878889935	2.11835e+07	6.03215e+09	6.05334e+09
Bunge Limited	CTUe	ecotox_freshwater	Vegetable Oil Mills, Except Corn, Cottonseed, and Soybean	FMCG	175271832	2.10824e+08	5.79599e+09	6.00682e+09
PetroChina Company Limited Class H	CTUe	ecotox_freshwater	Crude Petroleum and Natural Gas	Oil & Gas Extraction	67807951	6.82595e+08	5.31419e+09	5.99679e+09
Johnson Controls International plc	CTUe	ecotox_freshwater	Public Building and Related Furniture	Consumer Discretionary	1255079481	4.21006e+07	5.54638e+09	5.58848e+09
adidas AG	CTUe	ecotox_freshwater	Rubber and Plastics Footwear	Consumer Discretionary	795871507	1.85461e+08	5.02507e+09	5.21053e+09
Aptiv PLC	CTUe	ecotox_freshwater	Motor Vehicle Parts and Accessories	Automotive	1137226607	1.01232e+08	5.0321e+09	5.13334e+09
Koninklijke DSM N.V.	CTUe	ecotox_freshwater	Industrial Organic Chemicals, Not Elsewhere Classified	Chemicals	806229203	2.46783e+08	4.41891e+09	4.66569e+09
Hon Hai Precision Industry Co., Ltd.	CTUe	ecotox_freshwater	Computer Peripheral Equipment, Not Elsewhere Classified	IT	360251393	3.01561e+07	4.50235e+09	4.5325e+09
Johnson Matthey Plc	CTUe	ecotox_freshwater	Chemicals and Chemical Preparations, Not Elsewhere Classified	Chemicals	259021394	2.63751e+08	4.03261e+09	4.29636e+09
Volkswagen AG Pref	CTUe	ecotox_freshwater	Motor Vehicles and Passenger Car Bodies	Automotive	114889803	6.87669e+07	4.00992e+09	4.07869e+09
Prysmian S.p.A.	CTUe	ecotox_freshwater	Drawing and Insulating of Nonferrous Wire	Manufacturing metals	391230678	3.38305e+07	3.99443e+09	4.02826e+09
Iberdrola SA	CTUe	ecotox_freshwater	Electric Services	Utilities	1010198473	2.07677e+09	1.76953e+09	3.84629e+09
Shell PLC	CTUe	ecotox_freshwater	Crude Petroleum and Natural Gas	Oil & Gas Extraction	343991918	7.96801e+08	2.87181e+09	3.66862e+09
Texas Instruments Incorporated	CTUe	ecotox_freshwater	Semiconductors and Related Devices	IT	1519455953	1.00076e+07	3.55756e+09	3.56757e+09
Associated British Foods plc	CTUe	ecotox_freshwater	Food Preparations, Not Elsewhere Classified	FMCG	421917268	7.3604e+07	3.47157e+09	3.54517e+09
Umicore	CTUe	ecotox_freshwater	Rolling, Drawing, and Extrud. of Nonferr. Mtl. Excp. Copper/Alum.	Manufacturing metals	159137122	1.241e+09	2.09206e+09	3.33305e+09
Apple Inc.	CTUe	ecotox_freshwater	Radio and Television Broadcasting and Communications Equipment	IT	4133126403	2.57432e+07	3.306e+09	3.33175e+09
NIKE, Inc. Class B	CTUe	ecotox_freshwater	Rubber and Plastics Footwear	Consumer Discretionary	1315669353	1.85914e+08	3.0696e+09	3.25551e+09
Allianz SE	CTUe	ecotox_freshwater	Insurance Carriers, Not Elsewhere Classified	Financials	1155488903	8.16567e+07	3.11646e+09	3.19812e+09
TotalEnergies SE	CTUe	ecotox_freshwater	Crude Petroleum and Natural Gas	Oil & Gas Extraction	500650784	3.95452e+08	2.72807e+09	3.12352e+09
Reckitt Benckiser Group plc	CTUe	ecotox_freshwater	Soap and Other Detergents, Except Specialty Cleaners	FMCG	811057424	1.353e+08	2.92726e+09	3.06256e+09
CNH Industrial NV	CTUe	ecotox_freshwater	Construction Machinery and Equipment	Industrials	229996108	4.70365e+07	2.9541e+09	3.00114e+09
Procter & Gamble Company	CTUe	ecotox_freshwater	Soap and Other Detergents, Except Specialty Cleaners	FMCG	1332956790	1.77002e+08	2.78075e+09	2.95775e+09

## Sheet: eutroph_marine
company_proper_name	unit	indicator_short	sic_desc	industry_new	holdings_adjusted_mv	scope_direct_owned	scope_indirect_owned	scope_lc_owned
Enel SpA	kg N eq	eutroph_marine	Electric Services	Utilities	792558441	2.42947e+08	2.17367e+07	2.64683e+08
Nestle S.A.	kg N eq	eutroph_marine	Food Preparations, Not Elsewhere Classified	FMCG	1651976028	2.64649e+06	1.34216e+08	1.36863e+08
Unilever PLC	kg N eq	eutroph_marine	Perfumes, Cosmetics, and Other Toilet Preparations	FMCG	1429065252	2.85764e+06	9.88953e+07	1.01753e+08
Iberdrola SA	kg N eq	eutroph_marine	Electric Services	Utilities	1010198473	8.8081e+07	1.13048e+07	9.93858e+07
China Mengniu Dairy Co., Ltd.	kg N eq	eutroph_marine	Dairy Farms	FMCG	927789363	463809	9.2527e+07	9.29908e+07
Danone SA	kg N eq	eutroph_marine	Food Preparations, Not Elsewhere Classified	FMCG	482306338	1.4039e+06	8.88299e+07	9.02338e+07
China Petroleum & Chemical Corporation Class H	kg N eq	eutroph_marine	Crude Petroleum and Natural Gas	Oil & Gas Extraction	134325218	3.02243e+07	5.6932e+07	8.71562e+07
PetroChina Company Limited Class H	kg N eq	eutroph_marine	Crude Petroleum and Natural Gas	Oil & Gas Extraction	67807951	3.42653e+07	3.7994e+07	7.22593e+07
Bunge Limited	kg N eq	eutroph_marine	Vegetable Oil Mills, Except Corn, Cottonseed, and Soybean	FMCG	175271832	1.00331e+06	7.04655e+07	7.14688e+07
Roche Holding Ltd Dividend Right Cert.	kg N eq	eutroph_marine	Pharmaceutical Preparations	Pharma	2954048751	4.60293e+06	4.57063e+07	5.03092e+07
Samsung Electronics Co Ltd Pfd Non-Voting	kg N eq	eutroph_marine	Radio and Television Broadcasting and Communications Equipment	IT	886343368	3.2315e+06	4.62047e+07	4.94362e+07
Schneider Electric SE	kg N eq	eutroph_marine	Current-Carrying Wiring Devices	Industrials	2648239123	977254	4.13345e+07	4.23117e+07
Associated British Foods plc	kg N eq	eutroph_marine	Food Preparations, Not Elsewhere Classified	FMCG	421917268	769365	3.98556e+07	4.06249e+07
Sanofi	kg N eq	eutroph_marine	Pharmaceutical Preparations	Pharma	1494781361	3.04351e+06	3.73133e+07	4.03568e+07
Samsung Electronics Co., Ltd.	kg N eq	eutroph_marine	Radio and Television Broadcasting and Communications Equipment	IT	2578987006	2.35643e+06	3.36927e+07	3.60492e+07
Nippon Yusen Kabushiki Kaisha	kg N eq	eutroph_marine	Deep Sea Foreign Transportation of Freight	Industrials	17426456	3.51048e+07	164149	3.52689e+07
CRH Plc	kg N eq	eutroph_marine	Cement, Hydraulic	Industrials	410347147	1.80641e+07	7.71362e+06	2.57777e+07
adidas AG	kg N eq	eutroph_marine	Rubber and Plastics Footwear	Consumer Discretionary	795871507	1.11841e+06	2.41501e+07	2.52685e+07
Siemens AG	kg N eq	eutroph_marine	Manufacturing Industries, Not Elsewhere Classified	Industrials	1240644335	2.45409e+06	2.27592e+07	2.52133e+07
Koninklijke DSM N.V.	kg N eq	eutroph_marine	Industrial Organic Chemicals, Not Elsewhere Classified	Chemicals	806229203	2.06761e+06	2.26381e+07	2.47057e+07
Shell PLC	kg N eq	eutroph_marine	Crude Petroleum and Natural Gas	Oil & Gas Extraction	343991918	7.8227e+06	1.37115e+07	2.15342e+07
Johnson Matthey Plc	kg N eq	eutroph_marine	Chemicals and Chemical Preparations, Not Elsewhere Classified	Chemicals	259021394	1.81224e+06	1.90919e+07	2.09041e+07
Republic Services, Inc.	kg N eq	eutroph_marine	Refuse Systems	Industrials	965286804	1.94334e+07	1.41167e+06	2.08451e+07
PepsiCo, Inc.	kg N eq	eutroph_marine	Bottled and Canned Soft Drinks and Carbonated Waters	FMCG	494787555	658258	1.90974e+07	1.97557e+07
NextEra Energy, Inc.	kg N eq	eutroph_marine	Electric Services	Utilities	1804118352	1.88173e+07	652981	1.94702e+07
Allianz SE	kg N eq	eutroph_marine	Insurance Carriers, Not Elsewhere Classified	Financials	1155488903	2.24869e+06	1.70577e+07	1.93064e+07
TotalEnergies SE	kg N eq	eutroph_marine	Crude Petroleum and Natural Gas	Oil & Gas Extraction	500650784	5.0972e+06	1.30238e+07	1.8121e+07
Procter & Gamble Company	kg N eq	eutroph_marine	Soap and Other Detergents, Except Specialty Cleaners	FMCG	1332956790	1.66476e+06	1.62155e+07	1.78802e+07
Kerry Group Plc Class A	kg N eq	eutroph_marine	Flavoring Extracts and Flavoring Syrups, Not Elsewhere Classified	FMCG	556352561	738311	1.60677e+07	1.6806e+07
Bayerische Motoren Werke AG	kg N eq	eutroph_marine	Motor Vehicles and Passenger Car Bodies	Automotive	346073204	680276	1.56394e+07	1.63197e+07
EDP-Energias de Portugal SA	kg N eq	eutroph_marine	Electric Services	Utilities	210918965	1.40164e+07	2.10931e+06	1.61257e+07
Infineon Technologies AG	kg N eq	eutroph_marine	Semiconductors and Related Devices	IT	2143444788	214496	1.52161e+07	1.54306e+07
Tencent Holdings Ltd.	kg N eq	eutroph_marine	Information Retrieval Services	IT	2832293151	37297.3	1.53205e+07	1.53578e+07
Reckitt Benckiser Group plc	kg N eq	eutroph_marine	Soap and Other Detergents, Except Specialty Cleaners	FMCG	811057424	1.05466e+06	1.41571e+07	1.52118e+07
Akzo Nobel N.V.	kg N eq	eutroph_marine	Paints, Varnishes, Lacquers, Enamels, and Allied Products	Chemicals	356941102	1.19346e+06	1.3153e+07	1.43465e+07

## Sheet: eutroph_freshwater
company_proper_name	unit	indicator_short	sic_desc	industry_new	holdings_adjusted_mv	scope_direct_owned	scope_indirect_owned	scope_lc_owned
Nestle S.A.	kg P eq	eutroph_freshwater	Food Preparations, Not Elsewhere Classified	FMCG	1651976028	0	4.76214e+07	4.76214e+07
China Mengniu Dairy Co., Ltd.	kg P eq	eutroph_freshwater	Dairy Farms	FMCG	927789363	0	4.34915e+07	4.34915e+07
Danone SA	kg P eq	eutroph_freshwater	Food Preparations, Not Elsewhere Classified	FMCG	482306338	0	4.21647e+07	4.21647e+07
Unilever PLC	kg P eq	eutroph_freshwater	Perfumes, Cosmetics, and Other Toilet Preparations	FMCG	1429065252	0	3.69031e+07	3.69031e+07
Kering SA	kg P eq	eutroph_freshwater	Miscellaneous Retail Stores, Not Elsewhere Classified	Consumer Discretionary	799450150	0	3.2647e+07	3.2647e+07
adidas AG	kg P eq	eutroph_freshwater	Rubber and Plastics Footwear	Consumer Discretionary	795871507	0	2.53499e+07	2.53499e+07
LVMH Moet Hennessy Louis Vuitton SE	kg P eq	eutroph_freshwater	Women's, Misses', and Juniors' Dresses	Consumer Discretionary	1341168263	0	2.00158e+07	2.00158e+07
Bunge Limited	kg P eq	eutroph_freshwater	Vegetable Oil Mills, Except Corn, Cottonseed, and Soybean	FMCG	175271832	0	1.93932e+07	1.93932e+07
NIKE, Inc. Class B	kg P eq	eutroph_freshwater	Rubber and Plastics Footwear	Consumer Discretionary	1315669353	0	1.76803e+07	1.76803e+07
Roche Holding Ltd Dividend Right Cert.	kg P eq	eutroph_freshwater	Pharmaceutical Preparations	Pharma	2954048751	0	1.57563e+07	1.57563e+07
Sanofi	kg P eq	eutroph_freshwater	Pharmaceutical Preparations	Pharma	1494781361	0	1.30004e+07	1.30004e+07
China Petroleum & Chemical Corporation Class H	kg P eq	eutroph_freshwater	Crude Petroleum and Natural Gas	Oil & Gas Extraction	134325218	0	1.04234e+07	1.04234e+07
Koninklijke DSM N.V.	kg P eq	eutroph_freshwater	Industrial Organic Chemicals, Not Elsewhere Classified	Chemicals	806229203	0	8.36288e+06	8.36288e+06
Samsung Electronics Co Ltd Pfd Non-Voting	kg P eq	eutroph_freshwater	Radio and Television Broadcasting and Communications Equipment	IT	886343368	0	8.18621e+06	8.18621e+06
Schneider Electric SE	kg P eq	eutroph_freshwater	Current-Carrying Wiring Devices	Industrials	2648239123	0	6.55955e+06	6.55955e+06
Johnson Matthey Plc	kg P eq	eutroph_freshwater	Chemicals and Chemical Preparations, Not Elsewhere Classified	Chemicals	259021394	0	6.182e+06	6.182e+06
Samsung Electronics Co., Ltd.	kg P eq	eutroph_freshwater	Radio and Television Broadcasting and Communications Equipment	IT	2578987006	0	5.96943e+06	5.96943e+06
UnitedHealth Group Incorporated	kg P eq	eutroph_freshwater	Hospital and Medical Service Plans	Pharma	2084589813	0	5.91319e+06	5.91319e+06

## Sheet: eutroph_terr
company_proper_name	unit	indicator_short	sic_desc	industry_new	holdings_adjusted_mv	scope_direct_owned	scope_indirect_owned	scope_lc_owned
China Mengniu Dairy Co., Ltd.	mol N eq	eutroph_terr	Dairy Farms	FMCG	927789363	7.55786e+06	3.37005e+09	3.37761e+09
Enel SpA	mol N eq	eutroph_terr	Electric Services	Utilities	792558441	2.72149e+09	3.57322e+08	3.07881e+09
Danone SA	mol N eq	eutroph_terr	Food Preparations, Not Elsewhere Classified	FMCG	482306338	2.17467e+07	1.92874e+09	1.95048e+09
Nestle S.A.	mol N eq	eutroph_terr	Food Preparations, Not Elsewhere Classified	FMCG	1651976028	3.90355e+07	1.87495e+09	1.91398e+09
Unilever PLC	mol N eq	eutroph_terr	Perfumes, Cosmetics, and Other Toilet Preparations	FMCG	1429065252	3.45832e+07	1.56703e+09	1.60162e+09
China Petroleum & Chemical Corporation Class H	mol N eq	eutroph_terr	Crude Petroleum and Natural Gas	Oil & Gas Extraction	134325218	3.35592e+08	9.25601e+08	1.26119e+09
Iberdrola SA	mol N eq	eutroph_terr	Electric Services	Utilities	1010198473	9.69017e+08	1.57536e+08	1.12655e+09
PetroChina Company Limited Class H	mol N eq	eutroph_terr	Crude Petroleum and Natural Gas	Oil & Gas Extraction	67807951	3.91627e+08	5.74823e+08	9.6645e+08
Roche Holding Ltd Dividend Right Cert.	mol N eq	eutroph_terr	Pharmaceutical Preparations	Pharma	2954048751	5.14632e+07	8.54242e+08	9.05705e+08
Samsung Electronics Co Ltd Pfd Non-Voting	mol N eq	eutroph_terr	Radio and Television Broadcasting and Communications Equipment	IT	886343368	3.63451e+07	6.32072e+08	6.68417e+08
Sanofi	mol N eq	eutroph_terr	Pharmaceutical Preparations	Pharma	1494781361	3.43102e+07	6.17193e+08	6.51504e+08
Schneider Electric SE	mol N eq	eutroph_terr	Current-Carrying Wiring Devices	Industrials	2648239123	1.13208e+07	5.90405e+08	6.01726e+08
Bunge Limited	mol N eq	eutroph_terr	Vegetable Oil Mills, Except Corn, Cottonseed, and Soybean	FMCG	175271832	1.20717e+07	5.82905e+08	5.94976e+08
adidas AG	mol N eq	eutroph_terr	Rubber and Plastics Footwear	Consumer Discretionary	795871507	1.30072e+07	4.83854e+08	4.96861e+08
Samsung Electronics Co., Ltd.	mol N eq	eutroph_terr	Radio and Television Broadcasting and Communications Equipment	IT	2578987006	2.65031e+07	4.6091e+08	4.87413e+08
Koninklijke DSM N.V.	mol N eq	eutroph_terr	Industrial Organic Chemicals, Not Elsewhere Classified	Chemicals	806229203	2.33894e+07	4.05084e+08	4.28473e+08
Johnson Matthey Plc	mol N eq	eutroph_terr	Chemicals and Chemical Preparations, Not Elsewhere Classified	Chemicals	259021394	2.0139e+07	3.81113e+08	4.01252e+08
Nippon Yusen Kabushiki Kaisha	mol N eq	eutroph_terr	Deep Sea Foreign Transportation of Freight	Industrials	17426456	3.89179e+08	2.66484e+06	3.91844e+08
Siemens AG	mol N eq	eutroph_terr	Manufacturing Industries, Not Elsewhere Classified	Industrials	1240644335	2.77064e+07	3.33268e+08	3.60975e+08
Associated British Foods plc	mol N eq	eutroph_terr	Food Preparations, Not Elsewhere Classified	FMCG	421917268	8.74244e+06	3.44892e+08	3.53635e+08
NIKE, Inc. Class B	mol N eq	eutroph_terr	Rubber and Plastics Footwear	Consumer Discretionary	1315669353	9.10917e+06	3.00729e+08	3.09838e+08
Allianz SE	mol N eq	eutroph_terr	Insurance Carriers, Not Elsewhere Classified	Financials	1155488903	2.99248e+07	2.79626e+08	3.09551e+08
CRH Plc	mol N eq	eutroph_terr	Cement, Hydraulic	Industrials	410347147	1.98106e+08	1.02377e+08	3.00483e+08
Reckitt Benckiser Group plc	mol N eq	eutroph_terr	Soap and Other Detergents, Except Specialty Cleaners	FMCG	811057424	1.19512e+07	2.7858e+08	2.90531e+08
Procter & Gamble Company	mol N eq	eutroph_terr	Soap and Other Detergents, Except Specialty Cleaners	FMCG	1332956790	1.91655e+07	2.65803e+08	2.84968e+08
Shell PLC	mol N eq	eutroph_terr	Crude Petroleum and Natural Gas	Oil & Gas Extraction	343991918	8.60531e+07	1.98536e+08	2.84589e+08
Akzo Nobel N.V.	mol N eq	eutroph_terr	Paints, Varnishes, Lacquers, Enamels, and Allied Products	Chemicals	356941102	1.3432e+07	2.63168e+08	2.766e+08
TotalEnergies SE	mol N eq	eutroph_terr	Crude Petroleum and Natural Gas	Oil & Gas Extraction	500650784	5.62841e+07	2.12865e+08	2.69149e+08
Kering SA	mol N eq	eutroph_terr	Miscellaneous Retail Stores, Not Elsewhere Classified	Consumer Discretionary	799450150	4.23104e+06	2.59834e+08	2.64065e+08
Merck KGaA	mol N eq	eutroph_terr	Pharmaceutical Preparations	Pharma	418151324	1.41264e+07	2.4205e+08	2.56176e+08
L'Oreal S.A.	mol N eq	eutroph_terr	Perfumes, Cosmetics, and Other Toilet Preparations	FMCG	1031187763	1.36918e+07	2.36253e+08	2.49945e+08

## Sheet: humantox_noncan
company_proper_name	unit	indicator_short	sic_desc	industry_new	holdings_adjusted_mv	scope_direct_owned	scope_indirect_owned	scope_lc_owned
Schneider Electric SE	CTUh	humantox_noncan	Current-Carrying Wiring Devices	Industrials	2648239123	37.2638	5892.83	5930.09
Samsung Electronics Co Ltd Pfd Non-Voting	CTUh	humantox_noncan	Radio and Television Broadcasting and Communications Equipment	IT	886343368	31.6424	4894.03	4925.67
Samsung Electronics Co., Ltd.	CTUh	humantox_noncan	Radio and Television Broadcasting and Communications Equipment	IT	2578987006	23.0738	3568.75	3591.83
Siemens AG	CTUh	humantox_noncan	Manufacturing Industries, Not Elsewhere Classified	Industrials	1240644335	20.3439	2878.69	2899.03
ArcelorMittal SA	CTUh	humantox_noncan	Steel Works, Blast Furnaces (Incl. Coke Ovens), and Rolling Mills	Manufacturing metals	40753366	2010.46	503.211	2513.67
Intel Corporation	CTUh	humantox_noncan	Semiconductors and Related Devices	IT	890131561	8.12724	1860.12	1868.24
China Petroleum & Chemical Corporation Class H	CTUh	humantox_noncan	Crude Petroleum and Natural Gas	Oil & Gas Extraction	134325218	22.0148	1730.64	1752.65
Iberdrola SA	CTUh	humantox_noncan	Electric Services	Utilities	1010198473	1401.44	348.07	1749.51
Infineon Technologies AG	CTUh	humantox_noncan	Semiconductors and Related Devices	IT	2143444788	6.58136	1731.9	1738.48
Johnson Controls International plc	CTUh	humantox_noncan	Public Building and Related Furniture	Consumer Discretionary	1255079481	9.3559	1609.74	1619.09
Enel SpA	CTUh	humantox_noncan	Electric Services	Utilities	792558441	691.221	886.68	1577.9
NXP Semiconductors NV	CTUh	humantox_noncan	Semiconductors and Related Devices	IT	1878889935	5.43521	1559.04	1564.47
Bayerische Motoren Werke AG	CTUh	humantox_noncan	Motor Vehicles and Passenger Car Bodies	Automotive	346073204	5.97406	1549.92	1555.9
A.P. Moller - Maersk A/S Class B	CTUh	humantox_noncan	Deep Sea Foreign Transportation of Freight	Industrials	54733926	761.946	549.224	1311.17
Aptiv PLC	CTUh	humantox_noncan	Motor Vehicle Parts and Accessories	Automotive	1137226607	4.30981	1299.91	1304.22
Hon Hai Precision Industry Co., Ltd.	CTUh	humantox_noncan	Computer Peripheral Equipment, Not Elsewhere Classified	IT	360251393	8.33915	1197.23	1205.57
Prysmian S.p.A.	CTUh	humantox_noncan	Drawing and Insulating of Nonferrous Wire	Manufacturing metals	391230678	8.96449	1139.03	1148
Volkswagen AG Pref	CTUh	humantox_noncan	Motor Vehicles and Passenger Car Bodies	Automotive	114889803	5.44059	1109.5	1114.94
Texas Instruments Incorporated	CTUh	humantox_noncan	Semiconductors and Related Devices	IT	1519455953	2.74903	919.213	921.962
PetroChina Company Limited Class H	CTUh	humantox_noncan	Crude Petroleum and Natural Gas	Oil & Gas Extraction	67807951	17.3286	893.616	910.944
Roche Holding Ltd Dividend Right Cert.	CTUh	humantox_noncan	Pharmaceutical Preparations	Pharma	2954048751	16.3852	854.398	870.783
CNH Industrial NV	CTUh	humantox_noncan	Construction Machinery and Equipment	Industrials	229996108	5.60151	844.46	850.061
Apple Inc.	CTUh	humantox_noncan	Radio and Television Broadcasting and Communications Equipment	IT	4133126403	3.28039	801.738	805.018
Umicore	CTUh	humantox_noncan	Rolling, Drawing, and Extrud. of Nonferr. Mtl. Excp. Copper/Alum.	Manufacturing metals	159137122	429.82	357.843	787.663
Vestas Wind Systems A/S	CTUh	humantox_noncan	Steam, Gas, and Hydraulic Turbines, and Turbine Generator Set Units	Industrials	614674131	7.21539	741.31	748.525
ON Semiconductor Corporation	CTUh	humantox_noncan	Semiconductors and Related Devices	IT	841958033	4.41662	692.786	697.202
Evergreen Marine Corp. (Taiwan) Ltd.	CTUh	humantox_noncan	Deep Sea Foreign Transportation of Freight	Industrials	36958030	164.467	515.717	680.184
Compagnie de Saint-Gobain SA	CTUh	humantox_noncan	Construction Materials, Not Elsewhere Classified	Retail and Trade	411705207	9.53829	656.553	666.092
Taiwan Semiconductor Manufacturing Co., Ltd.	CTUh	humantox_noncan	Semiconductors and Related Devices	IT	3698082717	4.5985	658.611	663.209
Nippon Yusen Kabushiki Kaisha	CTUh	humantox_noncan	Deep Sea Foreign Transportation of Freight	Industrials	17426456	644.033	7.3056	651.338
Renault SA	CTUh	humantox_noncan	Motor Vehicles and Passenger Car Bodies	Automotive	107956551	3.23636	618.706	621.942
Xylem Inc.	CTUh	humantox_noncan	Pumps and Pumping Equipment	IT	879955803	4.34882	600.582	604.93
Allegion PLC	CTUh	humantox_noncan	Metal Doors, Sash, Frames, Molding, and Trim Manufacturing	IT	467983786	37.4236	556.275	593.699
Shell PLC	CTUh	humantox_noncan	Crude Petroleum and Natural Gas	Oil & Gas Extraction	343991918	17.4228	571.902	589.325
Faurecia Societe europeenne	CTUh	humantox_noncan	Automotive Trimmings, Apparel Findings, and Related Products	FMCG	118673361	2.83467	582.881	585.715
Ternium S.A. Sponsored ADR	CTUh	humantox_noncan	Steel Works, Blast Furnaces (Incl. Coke Ovens), and Rolling Mills	Manufacturing metals	28321903	496.573	71.4389	568.012
TotalEnergies SE	CTUh	humantox_noncan	Crude Petroleum and Natural Gas	Oil & Gas Extraction	500650784	25.3094	526.365	551.674
Unilever PLC	CTUh	humantox_noncan	Perfumes, Cosmetics, and Other Toilet Preparations	FMCG	1429065252	10.0104	530.277	540.287
Signify NV	CTUh	humantox_noncan	Commercial, Industrial, and Institutional Electric Lighting Fixtures	Industrials	407494624	3.95085	522.378	526.329
Sanofi	CTUh	humantox_noncan	Pharmaceutical Preparations	Pharma	1494781361	10.0742	514.076	524.151
Allianz SE	CTUh	humantox_noncan	Insurance Carriers, Not Elsewhere Classified	Financials	1155488903	1.27602	505.412	506.688
voestalpine AG	CTUh	humantox_noncan	Steel Works, Blast Furnaces (Incl. Coke Ovens), and Rolling Mills	Manufacturing metals	10282700	418.535	82.8118	501.347

## Sheet: humantox_can
company_proper_name	unit	indicator_short	sic_desc	industry_new	holdings_adjusted_mv	scope_direct_owned	scope_indirect_owned	scope_lc_owned
Schneider Electric SE	CTUh	humantox_can	Current-Carrying Wiring Devices	Industrials	2648239123	1.49468	352.746	354.241
Samsung Electronics Co Ltd Pfd Non-Voting	CTUh	humantox_can	Radio and Television Broadcasting and Communications Equipment	IT	886343368	1.17891	313.521	314.7
Samsung Electronics Co., Ltd.	CTUh	humantox_can	Radio and Television Broadcasting and Communications Equipment	IT	2578987006	0.859668	228.621	229.481
China Mengniu Dairy Co., Ltd.	CTUh	humantox_can	Dairy Farms	FMCG	927789363	0.00905344	197.629	197.638
China Petroleum & Chemical Corporation Class H	CTUh	humantox_can	Crude Petroleum and Natural Gas	Oil & Gas Extraction	134325218	8.00071	159.4	167.4
Siemens AG	CTUh	humantox_can	Manufacturing Industries, Not Elsewhere Classified	Industrials	1240644335	0.882927	143.371	144.254
Infineon Technologies AG	CTUh	humantox_can	Semiconductors and Related Devices	IT	2143444788	0.32977	134.365	134.694
Intel Corporation	CTUh	humantox_can	Semiconductors and Related Devices	IT	890131561	0.34978	133.841	134.191
NXP Semiconductors NV	CTUh	humantox_can	Semiconductors and Related Devices	IT	1878889935	0.249181	125.057	125.306
Nestle S.A.	CTUh	humantox_can	Food Preparations, Not Elsewhere Classified	FMCG	1651976028	1.82459	111.548	113.373
Bayerische Motoren Werke AG	CTUh	humantox_can	Motor Vehicles and Passenger Car Bodies	Automotive	346073204	0.300965	100.482	100.783
Unilever PLC	CTUh	humantox_can	Perfumes, Cosmetics, and Other Toilet Preparations	FMCG	1429065252	1.80938	95.6885	97.4978
Aptiv PLC	CTUh	humantox_can	Motor Vehicle Parts and Accessories	Automotive	1137226607	0.194462	88.0944	88.2889
Texas Instruments Incorporated	CTUh	humantox_can	Semiconductors and Related Devices	IT	1519455953	0.121415	83.6212	83.7426
Danone SA	CTUh	humantox_can	Food Preparations, Not Elsewhere Classified	FMCG	482306338	0.749772	80.4961	81.2458
Hon Hai Precision Industry Co., Ltd.	CTUh	humantox_can	Computer Peripheral Equipment, Not Elsewhere Classified	IT	360251393	0.310497	77.6023	77.9128
Roche Holding Ltd Dividend Right Cert.	CTUh	humantox_can	Pharmaceutical Preparations	Pharma	2954048751	2.43507	69.9502	72.3853
Johnson Controls International plc	CTUh	humantox_can	Public Building and Related Furniture	Consumer Discretionary	1255079481	0.429412	71.5467	71.9761
PetroChina Company Limited Class H	CTUh	humantox_can	Crude Petroleum and Natural Gas	Oil & Gas Extraction	67807951	2.23128	63.2042	65.4355
Bunge Limited	CTUh	humantox_can	Vegetable Oil Mills, Except Corn, Cottonseed, and Soybean	FMCG	175271832	0.267513	63.7076	63.9751
Volkswagen AG Pref	CTUh	humantox_can	Motor Vehicles and Passenger Car Bodies	Automotive	114889803	0.19708	59.8129	60.01
Apple Inc.	CTUh	humantox_can	Radio and Television Broadcasting and Communications Equipment	IT	4133126403	0.192963	58.0087	58.2017
ArcelorMittal SA	CTUh	humantox_can	Steel Works, Blast Furnaces (Incl. Coke Ovens), and Rolling Mills	Manufacturing metals	40753366	39.6066	16.8938	56.5004
Sanofi	CTUh	humantox_can	Pharmaceutical Preparations	Pharma	1494781361	1.86139	50.0915	51.9529
Taiwan Semiconductor Manufacturing Co., Ltd.	CTUh	humantox_can	Semiconductors and Related Devices	IT	3698082717	0.108641	50.9916	51.1003
Prysmian S.p.A.	CTUh	humantox_can	Drawing and Insulating of Nonferrous Wire	Manufacturing metals	391230678	0.292807	49.3006	49.5934
Compagnie de Saint-Gobain SA	CTUh	humantox_can	Construction Materials, Not Elsewhere Classified	Retail and Trade	411705207	1.0883	46.1317	47.22
Umicore	CTUh	humantox_can	Rolling, Drawing, and Extrud. of Nonferr. Mtl. Excp. Copper/Alum.	Manufacturing metals	159137122	19.5172	23.6292	43.1464
Qualcomm Incorporated	CTUh	humantox_can	Radio and Television Broadcasting and Communications Equipment	IT	1144692886	0.043286	42.9397	42.983
Enel SpA	CTUh	humantox_can	Electric Services	Utilities	792558441	8.49729	31.6645	40.1618
Koninklijke DSM N.V.	CTUh	humantox_can	Industrial Organic Chemicals, Not Elsewhere Classified	Chemicals	806229203	1.36622	34.3655	35.7318
Renault SA	CTUh	humantox_can	Motor Vehicles and Passenger Car Bodies	Automotive	107956551	0.138074	34.4697	34.6078
CNH Industrial NV	CTUh	humantox_can	Construction Machinery and Equipment	Industrials	229996108	0.222654	32.7854	33.008
ON Semiconductor Corporation	CTUh	humantox_can	Semiconductors and Related Devices	IT	841958033	0.214567	32.6161	32.8307
Tencent Holdings Ltd.	CTUh	humantox_can	Information Retrieval Services	IT	2832293151	0.0886461	32.2752	32.3638

## Sheet: lu_biodiv_loss
company_proper_name	unit	indicator_short	sic_desc	industry_new	holdings_adjusted_mv	scope_direct_owned	scope_indirect_owned	scope_lc_owned
China Mengniu Dairy Co., Ltd.	global PDF/MEUR	lu_biodiv_loss	Dairy Farms	FMCG	927789363	1.73e-09	0.000274735	0.000274737
Danone SA	global PDF/MEUR	lu_biodiv_loss	Food Preparations, Not Elsewhere Classified	FMCG	482306338	2.25e-07	0.000199742	0.000199967
Nestle S.A.	global PDF/MEUR	lu_biodiv_loss	Food Preparations, Not Elsewhere Classified	FMCG	1651976028	1.48e-07	0.000147463	0.000147611
Unilever PLC	global PDF/MEUR	lu_biodiv_loss	Perfumes, Cosmetics, and Other Toilet Preparations	FMCG	1429065252	9.07e-08	0.000127417	0.000127508
Bunge Limited	global PDF/MEUR	lu_biodiv_loss	Vegetable Oil Mills, Except Corn, Cottonseed, and Soybean	FMCG	175271832	1.37e-08	8.88e-05	8.88e-05
Roche Holding Ltd Dividend Right Cert.	global PDF/MEUR	lu_biodiv_loss	Pharmaceutical Preparations	Pharma	2954048751	2.89e-11	6.4e-05	6.4e-05
UPM-Kymmene Oyj	global PDF/MEUR	lu_biodiv_loss	Pulp Mills	Industrials	483038755	3.12e-05	3.14e-05	6.26e-05
Smurfit Kappa Group Plc	global PDF/MEUR	lu_biodiv_loss	Packaging Paper and Plastics Film, Coated and Laminated	Paper	436408950	1.28e-08	5.47e-05	5.47e-05
Sanofi	global PDF/MEUR	lu_biodiv_loss	Pharmaceutical Preparations	Pharma	1494781361	5.12e-10	5.37e-05	5.37e-05
Stora Enso Oyj Class R	global PDF/MEUR	lu_biodiv_loss	Paper Mills	Paper	120950825	3.63e-05	1.65e-05	5.28e-05
China Petroleum & Chemical Corporation Class H	global PDF/MEUR	lu_biodiv_loss	Crude Petroleum and Natural Gas	Oil & Gas Extraction	134325218	6.48e-09	4.23e-05	4.23e-05
adidas AG	global PDF/MEUR	lu_biodiv_loss	Rubber and Plastics Footwear	Consumer Discretionary	795871507	2.15e-09	3.82e-05	3.82e-05
Koninklijke DSM N.V.	global PDF/MEUR	lu_biodiv_loss	Industrial Organic Chemicals, Not Elsewhere Classified	Chemicals	806229203	6.78e-11	3.67e-05	3.67e-05
NIKE, Inc. Class B	global PDF/MEUR	lu_biodiv_loss	Rubber and Plastics Footwear	Consumer Discretionary	1315669353	7e-10	3.54e-05	3.54e-05
International Paper Company	global PDF/MEUR	lu_biodiv_loss	Paper Mills	Paper	226068780	1.32e-09	3.29e-05	3.29e-05
Samsung Electronics Co Ltd Pfd Non-Voting	global PDF/MEUR	lu_biodiv_loss	Radio and Television Broadcasting and Communications Equipment	IT	886343368	2.14e-10	3.25e-05	3.25e-05
WestRock Company	global PDF/MEUR	lu_biodiv_loss	Folding Paperboard Boxes, Including Sanitary	Paper	340746473	1.22e-10	3.14e-05	3.14e-05
Johnson Matthey Plc	global PDF/MEUR	lu_biodiv_loss	Chemicals and Chemical Preparations, Not Elsewhere Classified	Chemicals	259021394	1.9e-11	2.94e-05	2.94e-05

## Sheet: mat_footprint
company_proper_name	unit	indicator_short	sic_desc	industry_new	holdings_adjusted_mv	scope_direct_owned	scope_indirect_owned	scope_lc_owned
Roche Holding Ltd Dividend Right Cert.	kt/MEUR	mat_footprint	Pharmaceutical Preparations	Pharma	2954048751	65.1328	86035.4	86100.5
Unilever PLC	kt/MEUR	mat_footprint	Perfumes, Cosmetics, and Other Toilet Preparations	FMCG	1429065252	121.107	77091.1	77212.2
China Petroleum & Chemical Corporation Class H	kt/MEUR	mat_footprint	Crude Petroleum and Natural Gas	Oil & Gas Extraction	134325218	10706.1	66348.2	77054.3
Shell PLC	kt/MEUR	mat_footprint	Crude Petroleum and Natural Gas	Oil & Gas Extraction	343991918	38221.5	34849.8	73071.3
Sanofi	kt/MEUR	mat_footprint	Pharmaceutical Preparations	Pharma	1494781361	45.3187	70963	71008.3
Schneider Electric SE	kt/MEUR	mat_footprint	Current-Carrying Wiring Devices	Industrials	2648239123	2.55983	69453.5	69456.1
Samsung Electronics Co Ltd Pfd Non-Voting	kt/MEUR	mat_footprint	Radio and Television Broadcasting and Communications Equipment	IT	886343368	2.84647	68801.7	68804.5
Koninklijke DSM N.V.	kt/MEUR	mat_footprint	Industrial Organic Chemicals, Not Elsewhere Classified	Chemicals	806229203	29.9998	54350.2	54380.2
Samsung Electronics Co., Ltd.	kt/MEUR	mat_footprint	Radio and Television Broadcasting and Communications Equipment	IT	2578987006	2.07566	50170.6	50172.7
Johnson Matthey Plc	kt/MEUR	mat_footprint	Chemicals and Chemical Preparations, Not Elsewhere Classified	Chemicals	259021394	19.0175	45646.6	45665.6
TotalEnergies SE	kt/MEUR	mat_footprint	Crude Petroleum and Natural Gas	Oil & Gas Extraction	500650784	5167.22	33628.1	38795.3
Nestle S.A.	kt/MEUR	mat_footprint	Food Preparations, Not Elsewhere Classified	FMCG	1651976028	129.813	37209.5	37339.3
Enel SpA	kt/MEUR	mat_footprint	Electric Services	Utilities	792558441	1936.3	35318.5	37254.8
Siemens AG	kt/MEUR	mat_footprint	Manufacturing Industries, Not Elsewhere Classified	Industrials	1240644335	2.33825	35725.6	35728
Repsol SA	kt/MEUR	mat_footprint	Crude Petroleum and Natural Gas	Oil & Gas Extraction	147075650	6783.44	28395.9	35179.3
PetroChina Company Limited Class H	kt/MEUR	mat_footprint	Crude Petroleum and Natural Gas	Oil & Gas Extraction	67807951	12904.2	21123.3	34027.5
Akzo Nobel N.V.	kt/MEUR	mat_footprint	Paints, Varnishes, Lacquers, Enamels, and Allied Products	Chemicals	356941102	22.6408	33543.5	33566.1
Merck KGaA	kt/MEUR	mat_footprint	Pharmaceutical Preparations	Pharma	418151324	12.0248	32650.3	32662.3
CRH Plc	kt/MEUR	mat_footprint	Cement, Hydraulic	Industrials	410347147	4046.96	28576	32623
L'Oreal S.A.	kt/MEUR	mat_footprint	Perfumes, Cosmetics, and Other Toilet Preparations	FMCG	1031187763	19.7527	30632.3	30652
adidas AG	kt/MEUR	mat_footprint	Rubber and Plastics Footwear	Consumer Discretionary	795871507	2.70974	30537.5	30540.2
Reckitt Benckiser Group plc	kt/MEUR	mat_footprint	Soap and Other Detergents, Except Specialty Cleaners	FMCG	811057424	16.2706	28665.2	28681.5
Procter & Gamble Company	kt/MEUR	mat_footprint	Soap and Other Detergents, Except Specialty Cleaners	FMCG	1332956790	19.0975	28422.2	28441.3
Novo Nordisk A/S Class B	kt/MEUR	mat_footprint	Pharmaceutical Preparations	Pharma	1638925029	14.2859	27008.3	27022.5
Baker Hughes Company Class A	kt/MEUR	mat_footprint	Oil and Gas Field Services, Not Elsewhere Classified	Oil & Gas Extraction	283066058	22932.7	4070.86	27003.6
Infineon Technologies AG	kt/MEUR	mat_footprint	Semiconductors and Related Devices	IT	2143444788	0.684545	25053.5	25054.2
Compagnie de Saint-Gobain SA	kt/MEUR	mat_footprint	Construction Materials, Not Elsewhere Classified	Retail and Trade	411705207	261.242	24029.2	24290.4
Danone SA	kt/MEUR	mat_footprint	Food Preparations, Not Elsewhere Classified	FMCG	482306338	127.403	23767.7	23895.1
AstraZeneca PLC	kt/MEUR	mat_footprint	Pharmaceutical Preparations	Pharma	943874122	12.8639	23298.1	23311
Intel Corporation	kt/MEUR	mat_footprint	Semiconductors and Related Devices	IT	890131561	0.2256	22664.3	22664.5
China Mengniu Dairy Co., Ltd.	kt/MEUR	mat_footprint	Dairy Farms	FMCG	927789363	1.53521	22139.6	22141.2
Bayerische Motoren Werke AG	kt/MEUR	mat_footprint	Motor Vehicles and Passenger Car Bodies	Automotive	346073204	0.276292	21937.2	21937.5
Umicore	kt/MEUR	mat_footprint	Rolling, Drawing, and Extrud. of Nonferr. Mtl. Excp. Copper/Alum.	Manufacturing metals	159137122	20.2374	20821.7	20841.9
Bunge Limited	kt/MEUR	mat_footprint	Vegetable Oil Mills, Except Corn, Cottonseed, and Soybean	FMCG	175271832	46.0485	20519.5	20565.5
Associated British Foods plc	kt/MEUR	mat_footprint	Food Preparations, Not Elsewhere Classified	FMCG	421917268	59.535	19853.8	19913.3
Ecolab Inc.	kt/MEUR	mat_footprint	Industrial Inorganic Chemicals, Not Elsewhere Classified	Industrials	1113285555	18.9456	19806.1	19825
NXP Semiconductors NV	kt/MEUR	mat_footprint	Semiconductors and Related Devices	IT	1878889935	0.327212	19735.8	19736.1
Kering SA	kt/MEUR	mat_footprint	Miscellaneous Retail Stores, Not Elsewhere Classified	Consumer Discretionary	799450150	0.316298	19423.4	19423.7
Aptiv PLC	kt/MEUR	mat_footprint	Motor Vehicle Parts and Accessories	Automotive	1137226607	0.146299	18954.8	18954.9
Kerry Group Plc Class A	kt/MEUR	mat_footprint	Flavoring Extracts and Flavoring Syrups, Not Elsewhere Classified	FMCG	556352561	27.6018	18906.1	18933.7
NIKE, Inc. Class B	kt/MEUR	mat_footprint	Rubber and Plastics Footwear	Consumer Discretionary	1315669353	1.08268	18330.9	18332

[truncated: 17 more sheets: photochem_oz_form, pm_daly, water_stress, S, childrenempl_t, anticompbehaviour, fatalacc, forcedlabfreq, genderwagegap, invincorruption, nonfatalacc, rightsofassoc, rightsofcollectbarg, rightstrike, safetymeasures, trafficking, viollawemploymentreg]
